# Supplementary material for: The iron-sensing aconitase B binds its own mRNA to prevent sRNA-induced mRNA cleavage
Source: PubMed Central journal article supplement (PMC4150767; doi:10.1093/nar/gku649), 2014-08-04
Supplement: supp_gku649_nar-00950-z-2014-File010.pdf [file supp_gku649_nar-00950-z-2014-File010.pdf]

1  
2  
3  
4  
5  
6  
7  
8  
9  
10  
11  
12  
13  
14  
15  
16  
17  
18  
19  
20  
21  
22  
23  
24  
25  
26  
27  
28  
29  
30  
31  
32

## Supplemental Material

### The iron-sensing aconitase B binds its own mRNA to prevent sRNA-induced mRNA cleavage

Julie-Anna M. Benjamin and Eric Massé\*

Department of Biochemistry, RNA Group, University of Sherbrooke, Sherbrooke,  
Québec, Canada.

\*Corresponding author.  
Department of Biochemistry  
University of Sherbrooke  
3201 Jean Mignault  
Sherbrooke, Qc, J1E 4K8  
Canada

Phone (819) 821-8000 ext. 75475  
EMAIL: [eric.masse@usherbrooke.ca](mailto:eric.masse@usherbrooke.ca);

**This File includes**

**Supplementary Figures S1 to S4**

**Supplemental Material and Methods**

**Supplementary Tables S1 to S3**

**Supplementary References**

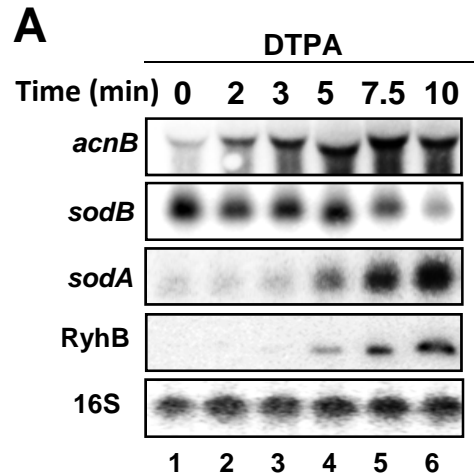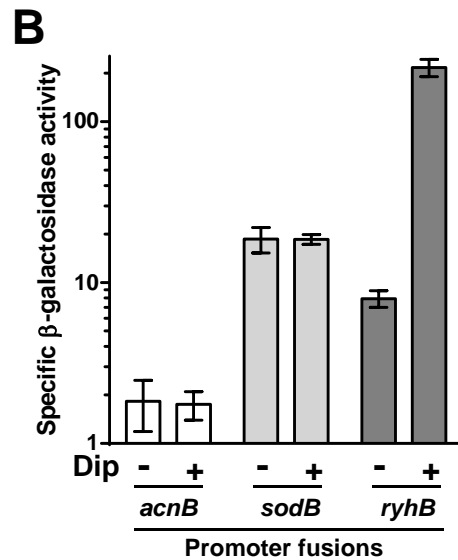

**Figure S1.** Effects of iron chelation on *acnB* expression. (A) Northern blot of total RNA hybridized with *acnB*, *sodB*, *sodA*, RyhB and 16S probes. RNA extraction was performed after addition of the iron chelator diethylene triamine pentaacetic acid (DTPA, final concentration of 100  $\mu$ M) at time 0 to induce RyhB expression in EM1055 cells. Time course was performed at indicated time, at an  $OD_{600}$  of 0.5. *sodB* mRNA was used as control for RyhB sRNA negative target and *sodA* mRNA as Fur protein negative target. 16S rRNA was used as a loading control. (B) Effect of Fe starvation on  $\beta$ -galactosidase activity of *acnB*, *sodB* and *ryhB* promoter transcriptional *lacZ* fusions in  $\Delta$ *ryhB* strains (EM1238). Fe chelator Dip (200  $\mu$ M) was added or not at an  $OD_{600}$  of 0.1 and specific activity was measured in triplicate. Transcriptional *sodB-lacZ* fusion was used as a negative control and transcriptional *ryhB-lacZ* fusion as a positive control for Fe-dependent promoter regulation.

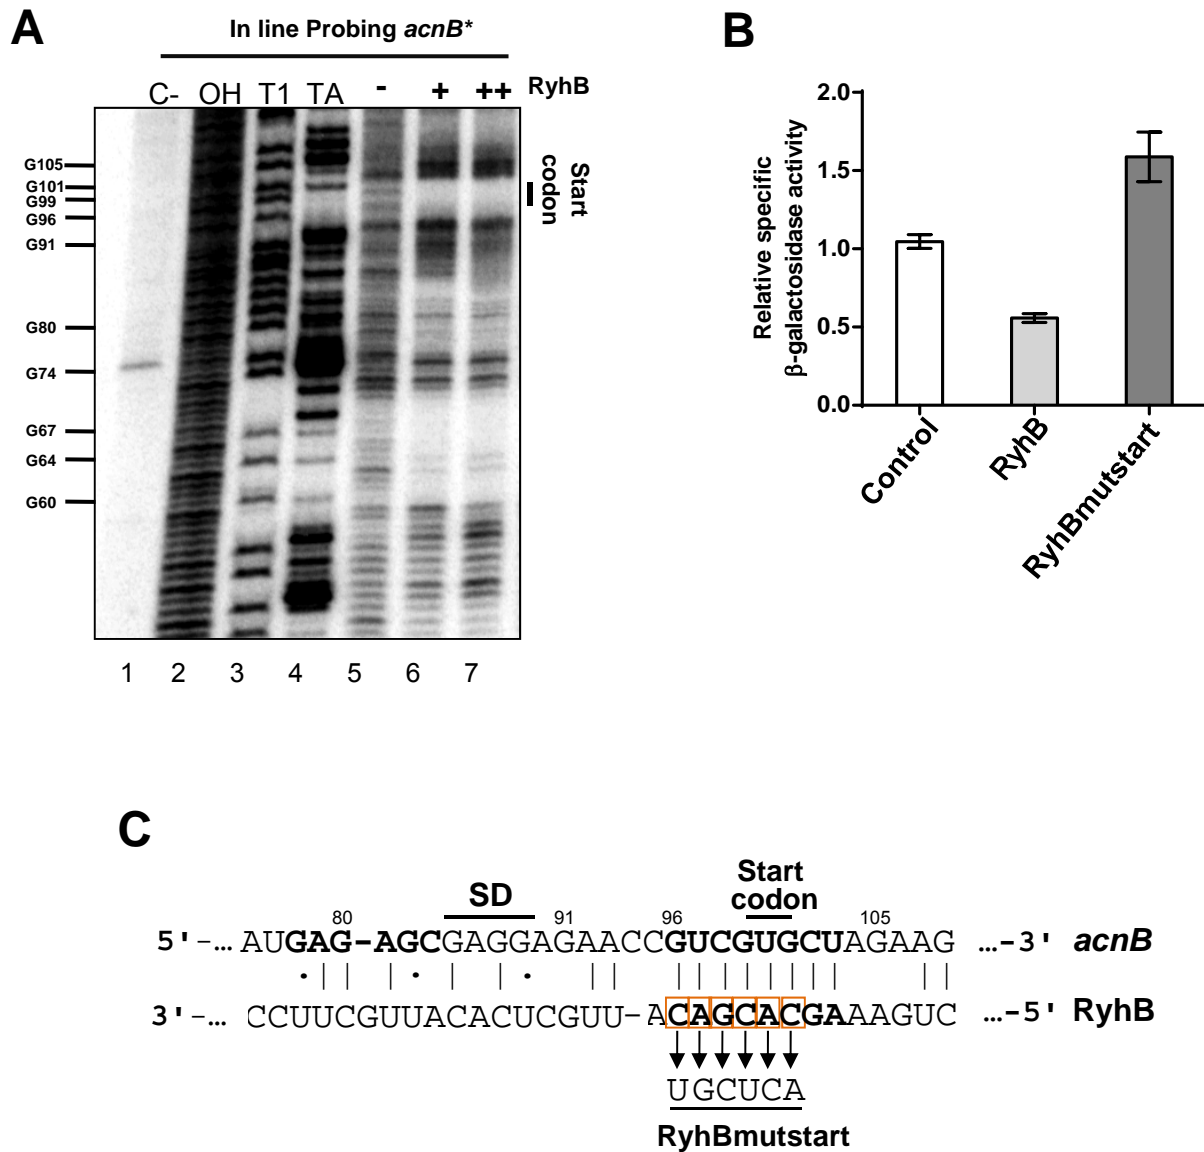

**Figure S2.** RyhB sRNA pairs to the translational initiation region of *acnB* mRNA. (A) *In vitro* pairing between sRNA RyhB and 5'-end-radiolabelled *acnB* mRNA. (Lane 1) Control of *acnB* mRNA transcript alone. In-line probing reaction where *acnB* 5'UTR RNA transcript was incubated with RyhB sRNA in rates of 1:0, 1:10 and 1:20 (Lanes 5-7). (Lane 2) NaOH ladder. (Lane 3) RNase T1 ladder. (Lanes 4) RNase TA ladder. (B) The translational fusion AcnB<sub>177</sub>-LacZ is specifically repressed by RyhB when induced from pBAD-*ryhB*. The sRNA RyhB is induced by Ara (0.01%) at an OD<sub>600</sub> of 0.1 and specific  $\beta$ -galactosidase activity has been measured 2h later. Expression of the RyhBmutstart (shown in (C)) from the pBAD-*ryhB*mutstart construct does not repress translation of AcnB<sub>177</sub>-LacZ translational fusion. This absence of repression suggests that the 6 nt-long mutation in RyhBmutstart prevents pairing between RyhB and *acnB* mRNA. The empty vector pNM12 has been used as a control. Specific activity was measured in triplicate and standard deviation are presented on graph. (C) *In silico* pairing prediction of RyhB sRNA on *acnB* mRNA on its translational initiation region by TargetRNA (57).



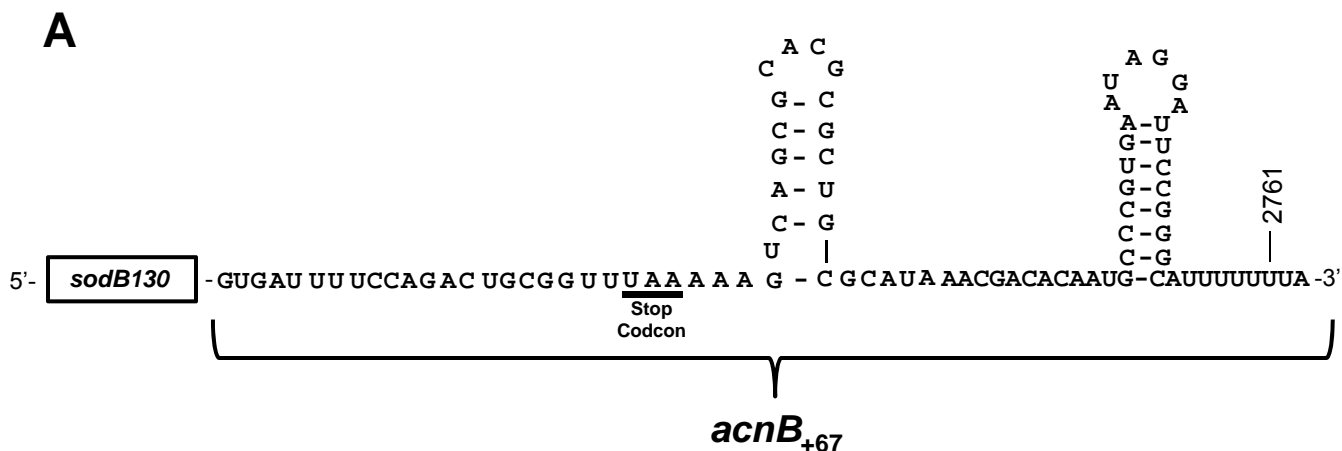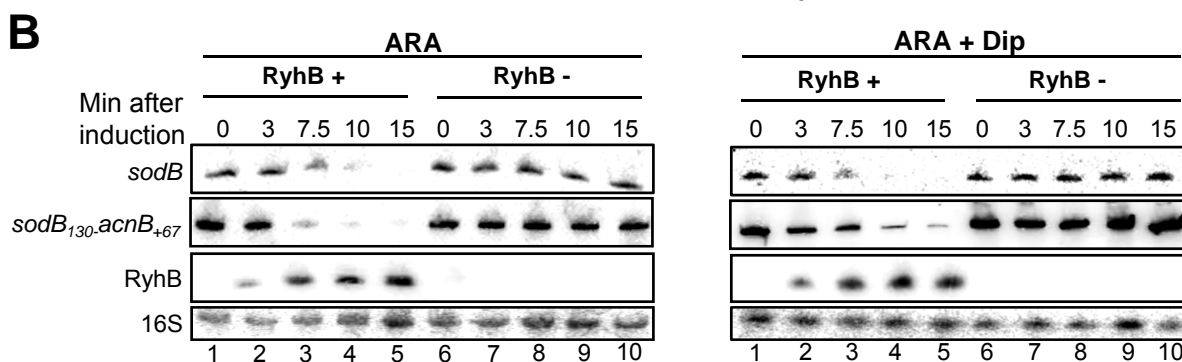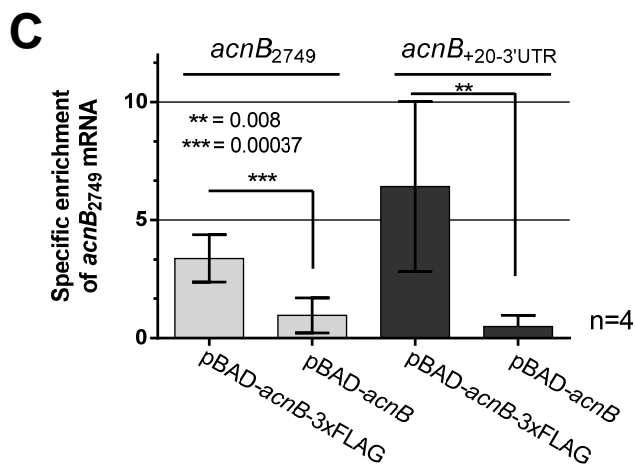

**Figure S4**

The *acnB* 3'UTR acts ectopically to stabilize a *sodB*<sub>130-*acnB*<sub>+67</sub></sub> chimeric fusion. (A) Schematic view of *sodB*<sub>130-*acnB*<sub>+67</sub></sub> construct in which *sodB* 5'UTR RNA (from nt 1 to nt 341) was fused to *acnB* from nt 2670 to nt 2761. (B) Northern blots of total RNA using an RNA probe specific to *sodB* showing the effect of RyhB expression on *sodB*<sub>130-*acnB*<sub>+67</sub></sub> construct. Left panel: arabinose (0.05% final) was added to induce expression of RyhB (pBAD-*ryhB*) or the control (pNM12) at an OD<sub>600</sub> of 0.5. Right panel, same as left panel except the Fe chelator Dip (200 μM final) was added 10 min before RyhB induction. Expression of endogenous *sodB* mRNA and RyhB sRNA is also shown. 16S ribosomal is used as a control. (C) AcnB<sub>3xFLAG</sub> RNA-IP experiment of *acnB*<sub>2749</sub> construct was compared with *acnB*<sub>2749-+20</sub> construct. In both construct, *acnB* were expressed from endogenous promoter in Fe-poor media. Then, AcnB was expressed (JAB292) in cells with plasmids pBAD-*acnB*<sub>3xFLAG</sub> and pBAD-*acnB*. RNA-IP was performed at an OD<sub>600</sub> of 0.5. qRT-PCR was performed for determination of *acnB*<sub>2749</sub> and *acnB*<sub>2749-+20</sub> specific enrichment by using 3'-end specific probes. Mean and s.d. of experiments are shown.

## Supplementary Material and Methods

### *Strain and plasmids*

Derivatives of *E. coli* MG1655 were used in all experiments. DH5 $\alpha$  strain was used for routine cloning procedures. Construction of *acnB*<sub>117</sub>-*lacZ*, *sodB-lacZ* and *ryhB-lacZ* (EM487-EM488) transcriptional fusions was constructed as described in Mitarai *et al.* (1).

To construct the AcnB<sub>2688</sub>-LacZ translational fusion, a PCR product obtained with oligonucleotides EM531 and EM549 was digested with *Bam*HI and ligated into *Bam*HI-digested pRS1551 (creating an in-frame translational fusion with *lacZ*). This fusion was then delivered as a single copy into the chromosome of different strains (see table S1) at the  $\lambda$  *attI* site, as described previously (2). Stable lysogens were screened for single insertion of recombinant  $\lambda$  by PCR (3).

To construct the *acnB*<sub>2749</sub>-*lacZ* transcriptional fusion, a PCR product was generated with oligonucleotides EM531 and EM1557 and then digested with *Bam*H1 and ligated into *Bam*H1-digested pFR $\Delta$  vector. To generate mutated versions of *acnB*<sub>2749</sub>-*lacZ*, a PCR reaction was performed using *acnB*<sub>2749</sub> PCR product as the DNA template with the following oligonucleotides: *acnB*<sub>2749</sub>-Mstem (EM531-EM1956), *acnB*<sub>2749</sub>-stem (EM531-EM2004) and *acnB*<sub>CC-stop-GCC</sub> (EM531-EM1821). For *acnB*<sub>+20-3'</sub>UTR construct, a two-step PCR strategy was used. While the first PCR was performed with oligonucleotides EM531-EM1958, the second step was performed by using oligonucleotides EM531-EM1959. The *acnB*<sub>+20-GCC</sub> construct was obtained by performing a PCR reaction with oligonucleotides EM531-EM2057 followed by another amplification reaction with oligonucleotides EM531 and EM2058. The resulting PCR product was then digested with *Bam*HI and ligated into *Bam*HI-digested pFR $\Delta$ . The cloning strategy used to generate plasmids pBAD33-*acnB*<sub>2749</sub>, pBAD33-*acnB*<sub>2749</sub>Mstem, pBAD33-*acnB*<sub>2749</sub>-stem and pBAD33-*acnB*<sub>+20-3'</sub>UTR was the same as described above for pFR $\Delta$  cloning except that the vector used for ligation was *Bam*H1-digested pBAD33. Those plasmids were transformed into appropriate strains before performing experiments.

To construct *sodB*<sub>130</sub>-*acnB*<sub>3'</sub>, a three-step PCR strategy was performed. A first PCR product (*sodB*<sub>130</sub>) was obtained by using oligonucleotides EM423-EM424 and *E. coli* genomic DNA. Then a second PCR was performed with oligonucleotides EM423-EM1957 on the previous *sodB*<sub>130</sub> PCR product as template. A third PCR product was obtained by amplifying the previous PCR product with EM423 and EM1939. Finally, the PCR product was digested with *Eco*R1 and *Bam*HI and then ligated into *Eco*RI/*Bam*H1-digested pFR $\Delta$ . The resulting transcriptional fusion was delivered as a single copy into the chromosome as described previously.

The plasmid pBAD24-*acnB* was generated by PCR reactions using oligonucleotides EM1695-EM1258 to produce a promoter-less *acnB* fragment. The resulting PCR product was digested with *Bam*H1/*Pst*I and ligated into *Bam*H1/*Pst*I-digested pBAD24. To construct the pBAD24-*acnB*-3x-FLAG plasmid, the following

65 oligonucleotides (EM1689-EM1747 and EM1695-EM549) were used to generate two PCR products. Following  
 66 this, both products were mixed and amplified with oligonucleotides EM1695-EM1748 to generate *acnB-3x-*  
 67 *FLAG*. Then, the final PCR was digested with *Bam*H1 and ligated into *Bam*H1-digested pBAD24.

68 Plasmid pET21b-*acnB-FLAG* was produced by a two-step PCR reaction to generate a promoter-less *acnB*  
 69 fragment using oligonucleotides EM1259-EM1260, which then served as template for a second PCR reaction  
 70 with oligonucleotides EM1259-EM1261. The final PCR product was digested with *Nde*1/*Xho*1 and ligated into  
 71 pET21b.

72 Plasmid pGD3 is a pBAD33 derivative (4) that has been mutagenized to insert a *Xho*I site at the -6 to -1 region  
 73 of the +1 transcription start site (see (5) for details). pGD3-*ryhB* was generated by a PCR reaction producing a  
 74 promoter-less *ryhB* DNA fragment with a *Xho*I site upstream and an *Eco*RI site downstream (oligonucleotides  
 75 EM1572-EM455). The PCR product was digested with *Xho*I and *Eco*RI and ligated into *Xho*I/*Eco*RI-digested  
 76 pGD3.

#### 77 *RNA secondary structure probing*

78 In line probing was performed as described previously (6).  $\gamma$ -5'-<sup>32</sup>P-end labelled *acnB*<sub>177</sub> RNA (final  
 79 concentration of 0.1  $\mu$ M) was incubated with 1  $\mu$ M or 2  $\mu$ M RyhB RNA. The *acnB*<sub>177</sub> and RyhB RNA were  
 80 produced using T7 RNA polymerase from a PCR product (see Table S3 for oligonucleotides). Ribonucleases T1  
 81 (0.1 U) (Ambion) and TA (2.5 U) (Jena Biosciences) were used for 5 min at 37°C in sequencing buffer  
 82 (Ambion). Alkaline ladder was generated in alkaline buffer (Ambion) for 5 min at 90°C.

#### 83 *Toeprinting assays*

84 Toeprinting analysis and 30S purification has been performed as described previously (5,7). Purification of Hfq  
 85 protein was performed as described previously (8).

#### 86 **Table S1**

87 List of all the strains and plasmids used in this study.

| Strain Number | Relevant Markers                                                                             | Reference/Source                                                    |
|---------------|----------------------------------------------------------------------------------------------|---------------------------------------------------------------------|
| EM1055        | MG1655 $\Delta$ <i>lacX74</i>                                                                | (9)                                                                 |
| EM1238        | EM1055 $\Delta$ <i>ryhB::cat</i>                                                             | (9)                                                                 |
| JF133         | EM1055 <i>rne131 zce-726::Tn10, ryhB::cat</i>                                                | (10)                                                                |
| EM1451        | EM1055 $\Delta$ <i>ara714 leu</i> <sup>+</sup>                                               | (11)                                                                |
| EM1455        | EM1055 $\Delta$ <i>ara714 leu</i> <sup>+</sup> <i>ryhB::cat</i>                              | EM1451 + P1vir EM1238                                               |
| DY330         | W3110 $\Delta$ <i>lacU169 gal490 <math>\Delta</math>cI857 <math>\Delta</math> (cro-bioA)</i> | (12)                                                                |
| GD363         | DY330 + <i>ryhB::tet</i> cassette                                                            | (5)                                                                 |
| KP1135        | EM1055 $\Delta$ <i>ara714 leu</i> <sup>+</sup> <i>ryhB::tet</i>                              | EM1451 + P1vir GD363                                                |
| JF222         | EM1055 <i>ryhB::cat <math>\lambda</math>acnB<sub>117'</sub>-lacZ</i>                         | EM1238 + $\lambda$ pFR $\Delta$ - <i>acnB</i> <sub>117'</sub> -lacZ |

|                                                                        |                                                                                                                  |                                                                                                |
|------------------------------------------------------------------------|------------------------------------------------------------------------------------------------------------------|------------------------------------------------------------------------------------------------|
| JAB017                                                                 | EM1055 $\lambda$ ryhB'-lacZ                                                                                      | EM1055 + $\lambda$ pFR $\Delta$ -ryhB'-lacZ                                                    |
| KP519                                                                  | EM1055 <i>sodB</i> <sub>130</sub> '-lacZ ryhB::cat                                                               | (10)                                                                                           |
| JAB242                                                                 | EM1055 <i>sodB</i> <sub>130</sub> - <i>acnB</i> <sub>+67</sub>                                                   | EM1055 + $\lambda$ pFR $\Delta$ - <i>sodB</i> <sub>130</sub> - <i>acnB</i> <sub>3</sub> '-lacZ |
| JAB243                                                                 | EM1055 ryhB::cat <i>sodB</i> <sub>130</sub> - <i>acnB</i> <sub>+67</sub>                                         | EM1238 + $\lambda$ pFR $\Delta$ - <i>sodB</i> <sub>130</sub> - <i>acnB</i> <sub>3</sub> '-lacZ |
| JAB246                                                                 | KP1135 $\Delta$ ara714 <i>leu</i> <sup>+</sup> ryhB::tet <i>sodB</i> <sub>130</sub> - <i>acnB</i> <sub>+67</sub> | KP1135 + $\lambda$ pFR $\Delta$ - <i>sodB</i> <sub>130</sub> - <i>acnB</i> <sub>3</sub> '-lacZ |
| GD432                                                                  | JW0014-5 ( <i>acnB</i> 736::kan)                                                                                 | (Keio collection, Yale)                                                                        |
| JAB154                                                                 | EM1055 $\Delta$ ara714 <i>leu</i> <sup>+</sup> <i>acnB</i> 736::kan                                              | EM1451 + P1 vir GD432                                                                          |
| JAB212                                                                 | EM1055 $\Delta$ ara714 <i>leu</i> <sup>+</sup> ryhB::tet <i>acnB</i> 736::kan                                    | JAB154 + P1 vir GD363                                                                          |
| JAB284                                                                 | EM1055 <i>acnB</i> 736::kan                                                                                      | EM1055 + P1 vir GD432                                                                          |
| JAB292                                                                 | EM1055 ryhB::tet <i>acnB</i> 736::kan                                                                            | JAB284 + P1 vir GD363                                                                          |
| JAB153                                                                 | EM1055 $\Delta$ ara714 <i>leu</i> <sup>+</sup> ryhB::cat <i>acnB</i> 736::kan                                    | EM1455 + P1 vir GD432                                                                          |
| JAB051                                                                 | EM1055 $\Delta$ ara714 <i>leu</i> <sup>+</sup> ryhB::cat $\lambda$ AcnB <sub>2688</sub> '-'LacZ                  | EM1055 + $\lambda$ pRS1551 AcnB <sub>2688</sub> '-'LacZ                                        |
| JAB068                                                                 | EM1055 ryhB::cat $\lambda$ AcnB <sub>2688</sub> '-'LacZ                                                          | EM1238 + $\lambda$ pRS1551-AcnB <sub>2688</sub> '-'LacZ                                        |
| KP760                                                                  | EM1055 $\Delta$ ara714 <i>leu</i> <sup>+</sup> ryhB::cat AcnB <sub>2688</sub> '-'LacZ                            | EM1455 + $\lambda$ pRS1551-AcnB <sub>2688</sub> '-'LacZ                                        |
| <b>Plasmids</b>                                                        | <b>Description</b>                                                                                               | <b>Reference/Sources</b>                                                                       |
| pBAD24                                                                 |                                                                                                                  | (4)                                                                                            |
| pNM12                                                                  | pBAD24 derivative                                                                                                | (13)                                                                                           |
| pBAD-ryhB                                                              | pNM12 + RyhB (arabinose-inducible promoter)                                                                      | (14)                                                                                           |
| pBAD-ryhBmutstart                                                      | pNM12 + RyhBmutstart (arabinose-inducible promoter)                                                              | This study                                                                                     |
| pGD3                                                                   | pBAD33 derivative                                                                                                | (5)                                                                                            |
| pGD3-ryhB                                                              | pGD3 + RyhB (arabinose-inducible promoter)                                                                       | This study                                                                                     |
| pBAD24- <i>acnB</i> -3xFlag                                            | pBAD24 + <i>acnB</i> + 3xFlag tag (arabinose inducible promoter)                                                 | This study                                                                                     |
| pBAD24- <i>acnB</i>                                                    | pBAD24 + <i>acnB</i> (arabinose inducible promoter)                                                              | This study                                                                                     |
| pRS1551                                                                | Plasmid for construction of translational fusions                                                                | (2)                                                                                            |
| pFR $\Delta$                                                           | pRS1553 derivative (for transcriptional fusions)                                                                 | (15)                                                                                           |
| pFR $\Delta$ - <i>acnB</i> <sub>2688</sub>                             | pFR $\Delta$ + <i>acnB</i> <sub>2688</sub>                                                                       | This study                                                                                     |
| pFR $\Delta$ - <i>acnB</i> <sub>2749</sub>                             | pFR $\Delta$ + <i>acnB</i> <sub>2749</sub>                                                                       | This study                                                                                     |
| pFR $\Delta$ - <i>acnB</i> <sub>2749</sub> -Mstem                      | pFR $\Delta$ + <i>acnB</i> <sub>2749</sub> -Mstem                                                                | This study                                                                                     |
| pFR $\Delta$ - <i>acnB</i> <sub>2749</sub> -stem                       | pFR $\Delta$ + <i>acnB</i> <sub>2749</sub> -stem                                                                 | This study                                                                                     |
| pFR $\Delta$ - <i>acnB</i> <sub>CC</sub> -stop-GCC                     | pFR $\Delta$ + <i>acnB</i> <sub>CC</sub> -stop-GCC                                                               | This study                                                                                     |
| pFR $\Delta$ - <i>acnB</i> <sub>+20</sub> -3'UTR                       | pFR $\Delta$ + <i>acnB</i> <sub>+20</sub> -3'UTR                                                                 | This study                                                                                     |
| pFR $\Delta$ - <i>acnB</i> <sub>+20</sub> -GCC                         | pFR $\Delta$ + <i>acnB</i> <sub>+20</sub> -GCC                                                                   | This study                                                                                     |
| pFR $\Delta$ - <i>sodB</i> <sub>130</sub> - <i>acnB</i> <sub>3</sub> ' | pFR $\Delta$ + <i>sodB</i> <sub>130</sub> - <i>acnB</i> <sub>3</sub> '                                           | This study                                                                                     |
| pBAD33                                                                 |                                                                                                                  | (4)                                                                                            |
| pBAD33-                                                                | pBAD33 + <i>acnB</i> <sub>2749</sub> (arabinose inducible promoter)                                              | This study                                                                                     |



|                                           |                                                                           |            |
|-------------------------------------------|---------------------------------------------------------------------------|------------|
| <i>acnB</i> <sub>2749</sub>               |                                                                           |            |
| pBAD33- <i>acnB</i> <sub>2749-Mstem</sub> | pBAD33 + <i>acnB</i> <sub>2749-Mstem</sub> (arabinose inducible promoter) | This study |
| pBAD33- <i>acnB</i> <sub>2749-stem</sub>  | pBAD33 + <i>acnB</i> <sub>2749stem</sub> (arabinose inducible promoter)   | This study |
| pBAD33- <i>acnB</i> <sub>+20-3'UTR</sub>  | pBAD33 + <i>acnB</i> <sub>+20-3'UTR</sub> (arabinose inducible promoter)  | This study |

88

89 **Table S2**

90 List of all the oligonucleotides used in this study.

| Oligo number | Sequence 5'-3'                                                                                 |
|--------------|------------------------------------------------------------------------------------------------|
| EM88         | TGTAATACGACTCACTATAGGGCGATCAGGAAGACCCTCGC                                                      |
| EM89         | AAAAGCCAGCACCCGGCTGGC                                                                          |
| EM125        | TGTAATACGACTCACTATAGGTGCGGTACTGGGCATTTACCC                                                     |
| EM140        | TAATACGACTCACTATAGGGAGAGCATCACCAGGTCAGCCGAG                                                    |
| EM141        | GATGAAGTGCCTGCTGGTGGC                                                                          |
| EM188        | TAATACGACTCACTATAGGGAGACCAGGCAGTTCCAGTAGAAAG                                                   |
| EM189        | GCTAAAGATGCTCTGGCACCG                                                                          |
| EM247        | GTAACCTCCGAACCGTCTG                                                                            |
| EM293        | TAATACGACTCACTATAGGGAGACGCTTTACGCCAGTAATTCC                                                    |
| EM294        | CTCCTACGGGAGGCAGCAGT                                                                           |
| EM305        | TAATACGACTCACTATAGGGAGAGCTTTGAAGTTATCAACGGAGC                                                  |
| EM306        | TCAGACCTACGTAAACAACGC                                                                          |
| EM411        | ACATCCGTA CTCTTCGTGCG                                                                          |
| EM412        | TGTAATACGACTCACTATAGGAGTCCAGGTTTTAGTTTTCGCC                                                    |
| EM423        | CAGTTGAATTCGGCGTGTATGTCCGGCAACGG                                                               |
| EM424        | GCTAGGGATCCTCGATGGTTTTCCGCAGAAATG                                                              |
| EM455        | CAGGCTGAAAATCTTCTCTCATC                                                                        |
| EM487        | CAGTTGAATTCCTGTTTCTGCGTGGCG                                                                    |
| EM488        | GCTAGGGATCCGCGAGACAATAATAATCATT                                                                |
| EM531        | GCTAGGGATCCTAGACCATCCTTAACGATTCAG                                                              |
| EM549        | GCTAGGGATCCGCAGGTCTGGAAAATCACCC                                                                |
| EM635        | TGTAATACGACTCACTATAGAACACATCAGATTTCTGGTG                                                       |
| EM636        | AAATCCCGACCCTGAGGG                                                                             |
| EM1258       | CCAATGCATTGGTTCTGCAGTTAAACCGCAGTCTGGAAAATCAC                                                   |
| EM1259       | GGAATTCATATG TGCGGTACTGGGCATTTACCC                                                             |
| EM1260       | AACCGCAGTCTGGAAAATCACC                                                                         |
| EM1261       | CCGCTCGAGTTATTTATCGTCATCGTCTTTGTAGTC<br>AACCGCAGTCTGGAAAATCACC                                 |
| EM1484       | GGTTTGCATCCAGGGGTTTGG                                                                          |
| EM1557       | GCTAGGGATCCGAATCTCATTACCCGGGCATTG                                                              |
| EM1572       | GGGGCTCGAGGCGATCAGGAAGACCCTCGC                                                                 |
| EM1573       | GAATCTCATTACCCGGGCATTG                                                                         |
| EM1578       | TGTAATACGACTCACTATAGGAGTACCAGACCTACGTGGCG                                                      |
| EM1596       | GAAATAAAAAAATGC CCG GGA ATC                                                                    |
| EM1689       | GACTACAAAGACCATGACGGTGATTATAAAGATCATGATATCGACTA<br>CAAAGATGACGACGATAAATAGTAAGTGTAGGCTGGAGCTGCT |
| EM1695       | GCTAGGGATCCTGCGGTACTGGGCATTTACCC                                                               |

|        |                                                                                                                                  |
|--------|----------------------------------------------------------------------------------------------------------------------------------|
| EM1744 | GCTAGGGATCCTGCGGTACTGGGCATTTACCC                                                                                                 |
| EM1747 | CGCAGTCTGGAAAATCACCCGACTACAAAGACCATGACGGTG                                                                                       |
| EM1748 | GCTAGGGATCCTTACTATTTATCGTCGTCATCTTTG                                                                                             |
| EM1767 | CTCTACAAGTGCGGCCATTGGTT                                                                                                          |
| EM1821 | GCTAGGGATCCGGCATTGTGTCGTTTATGCGCAGCGCGTGCGCTGACG<br>GCTTAGGCCGACAGTCTGGAAAATCAC                                                  |
| EM1939 | GCTAGGGATCCGTGATTTTCCAGACTGCGGTTTAAAAAGTCAGCGCAC<br>GCGCTGCGCATAAACGACACAATGCCCGGTGAATGAGATTCCCGGGC<br>ATTTTTTTATTTTCAATTCAGTCAG |
| EM1956 | GCTAGGGATCCGAATCTCATTACCCGGGCATTGTGTCGTTTATGCGGT<br>GCGCGTGCGCTGACTTTTTAAACCGCAG                                                 |
| EM1957 | CCGCAGTCTGGAAAATCACCTCGATGGTTTCCGCAGAAATGTG                                                                                      |
| EM1958 | GTGATTTTCCAGACTGCGGTTTAAAAAGCGUCGCUAAUUCUUGCCAG<br>GTCAGCGCACGCGCTGCG                                                            |
| EM1959 | GCTAGGGATCCGAAATAAAAAAATGCCCGGGAATC                                                                                              |
| EM2004 | GCTAGGGATCCGAATCTCATTACCCGGGCATTGTGTCGTTTATGCGGT<br>GCGCGTGCGCACACTTTTTAAACCGCAG                                                 |
| EM2057 | CTGGCAAGAATTAGCGACGCGGCTTAGGCCGACAGTCTGGAAAATC                                                                                   |
| EM2058 | GCTAGGGATCCGGAATCTCATTACCCGGGCATTGTGTCGTTTATGCGC<br>AGCGCGTGCGCTGACCTGGCAAGAATTAGCGACGC                                          |

### 91 Table S3

92 A list of all the RNA transcripts produced by T7 RNA polymerase in vitro transcription. Indicated are the final  
93 product (and its purpose), the oligonucleotides used to generate the DNA template by PCR and the DNA  
94 template used for the PCR.

| Final product                                                  | Oligonucleotides | DNA template                                            |
|----------------------------------------------------------------|------------------|---------------------------------------------------------|
| <i>acnB</i> (Northern probe)                                   | EM140 - EM141    | Genomic DNA                                             |
| RyhB (Northern probe)                                          | EM88 - EM89      | Genomic DNA                                             |
| <i>sodB</i> (Northern probe)                                   | EM188 - EM189    | Genomic DNA                                             |
| <i>sodA</i> (Northern probe)                                   | EM305 - EM306    | Genomic DNA                                             |
| <i>hns</i> (Northern probe)                                    | EM411 - EM412    | Genomic DNA                                             |
| 16S rRNA (Northern probe)                                      | EM293 - EM294    | Genomic DNA                                             |
| <i>acnB</i> <sub>177</sub> (5' end) (PbAc probing/toeprinting) | EM125 – EM1767   | Genomic DNA                                             |
| <i>acnB</i> (3' end) (Footprint/ degradation assay)            | EM1578 – EM1596  | Genomic DNA or pFRΔ- <i>acnB</i> <sub>CC-stop-GCC</sub> |
| RyhB (PbAc probing/toeprinting)                                | EM88-EM89        | Genomic DNA                                             |
| DsrA (PbAc probing/toeprinting)                                | EM635-EM636      | Genomic DNA                                             |
| <i>acnB</i> (qRT-PCR)                                          | EM247-EM1573     | Genomic DNA                                             |

### 95 References

- 96 1. Mitarai, N., Benjamin, J.A., Krishna, S., Semsey, S., Csiszovszki, Z., Masse, E. and Sneppen, K. (2009)  
97 Dynamic features of gene expression control by small regulatory RNAs. *Proceedings of the National  
98 Academy of Sciences of the United States of America*, **106**, 10655-10659.
- 99 2. Simons, R., Houman, F. and Kleckner, N. (1987) Improved single and multicopy lac-based cloning  
100 vectors for protein and operon fusions. *Gene*, **53**, 85-96.

- 101 3. Powell, B.S., Rivas, M., Court, D., Nakamura, Y. and Turnbough Jr, C. (1994) Rapid confirmation of  
102 single copy lambda prophage integration by PCR. *Nucleic acids research*, **22**, 5765.
- 103 4. Guzman, L.-M., Belin, D., Carson, M.J. and Beckwith, J. (1995) Tight regulation, modulation, and high-  
104 level expression by vectors containing the arabinose PBAD promoter. *Journal of bacteriology*, **177**,  
105 4121-4130.
- 106 5. Desnoyers, G. and Massé, E. (2012) Noncanonical repression of translation initiation through small  
107 RNA recruitment of the RNA chaperone Hfq. *Genes & development*, **26**, 726-739.
- 108 6. Regulski, E.E. and Breaker, R.R. (2008), *Post-Transcriptional Gene Regulation*. Springer, pp. 53-67.
- 109 7. Morita, M.T., Tanaka, Y., Kodama, T.S., Kyogoku, Y., Yanagi, H. and Yura, T. (1999) Translational  
110 induction of heat shock transcription factor  $\zeta$ 32: evidence for a built-in RNA thermosensor. *Genes &*  
111 *development*, **13**, 655-665.
- 112 8. Prevost, K., Salvail, H., Desnoyers, G., Jacques, J.F., Phaneuf, E. and Masse, E. (2007) The small RNA  
113 RyhB activates the translation of shiA mRNA encoding a permease of shikimate, a compound involved  
114 in siderophore synthesis. *Molecular microbiology*, **64**, 1260-1273.
- 115 9. Masse, E. and Gottesman, S. (2002) A small RNA regulates the expression of genes involved in iron  
116 metabolism in Escherichia coli. *Proceedings of the National Academy of Sciences of the United States of*  
117 *America*, **99**, 4620-4625.
- 118 10. Prevost, K., Desnoyers, G., Jacques, J.F., Lavoie, F. and Masse, E. (2011) Small RNA-induced mRNA  
119 degradation achieved through both translation block and activated cleavage. *Genes & development*, **25**,  
120 385-396.
- 121 11. Desnoyers, G., Morissette, A., Prevost, K. and Masse, E. (2009) Small RNA-induced differential  
122 degradation of the polycistronic mRNA iscRSUA. *The EMBO journal*, **28**, 1551-1561.
- 123 12. Yu, D., Ellis, H.M., Lee, E.-C., Jenkins, N.A. and Copeland, N.G. (2000) An efficient recombination  
124 system for chromosome engineering in Escherichia coli. *Proceedings of the National Academy of*  
125 *Sciences*, **97**, 5978-5983.
- 126 13. Majdalani, N., Cunnig, C., Sledjeski, D., Elliott, T. and Gottesman, S. (1998) DsrA RNA regulates  
127 translation of RpoS message by an anti-antisense mechanism, independent of its action as an antisilencer  
128 of transcription. *Proceedings of the National Academy of Sciences*, **95**, 12462-12467.
- 129 14. Masse, E., Escorcía, F.E. and Gottesman, S. (2003) Coupled degradation of a small regulatory RNA and  
130 its mRNA targets in Escherichia coli. *Genes & development*, **17**, 2374-2383.
- 131 15. Repoila, F. and Gottesman, S. (2001) Signal transduction cascade for regulation of RpoS: temperature  
132 regulation of DsrA. *Journal of bacteriology*, **183**, 4012-4023.
